# Supplementary material
Source: Research Square preprint supplement (doi:10.21203/rs.3.rs-8980608/v1)
Supplement: Supplementary file 1 [file 53aecc9e0d53dba3afdb09e3.docx]

**Linking water quality, health risks, and community responses in urban drinking water systems of a lower-middle-income city: Evidence from Bangladesh**

Md. Inzamul Haque1, Md. Anik Hossain1, *, Abu Reza2, Md. Asikur Rahman1, Most. Atia Parvin1, J S M Mahedi3, Md. Ashraful Islam Dewan1

1Dept. of Environmental Science and Geography, Islamic University, Kushtia-7003, Bangladesh

2Department of Genetic Engineering and Biotechnology, Daffodil International University, Dhaka-1216, Bangladesh

3International Centre for Diarrhoeal Disease Research (icddr,b), Dhaka 1212, Bangladesh

***Corresponding author:** [mahossain07.bd@gmail.com](mailto:mahossain07.bd@gmail.com), [mahossain@std.iu.ac.bd](mailto:mahossain@std.iu.ac.bd) (M.A Hossain)

**Supplementary files**

**Appendix A: Supplementary figures**


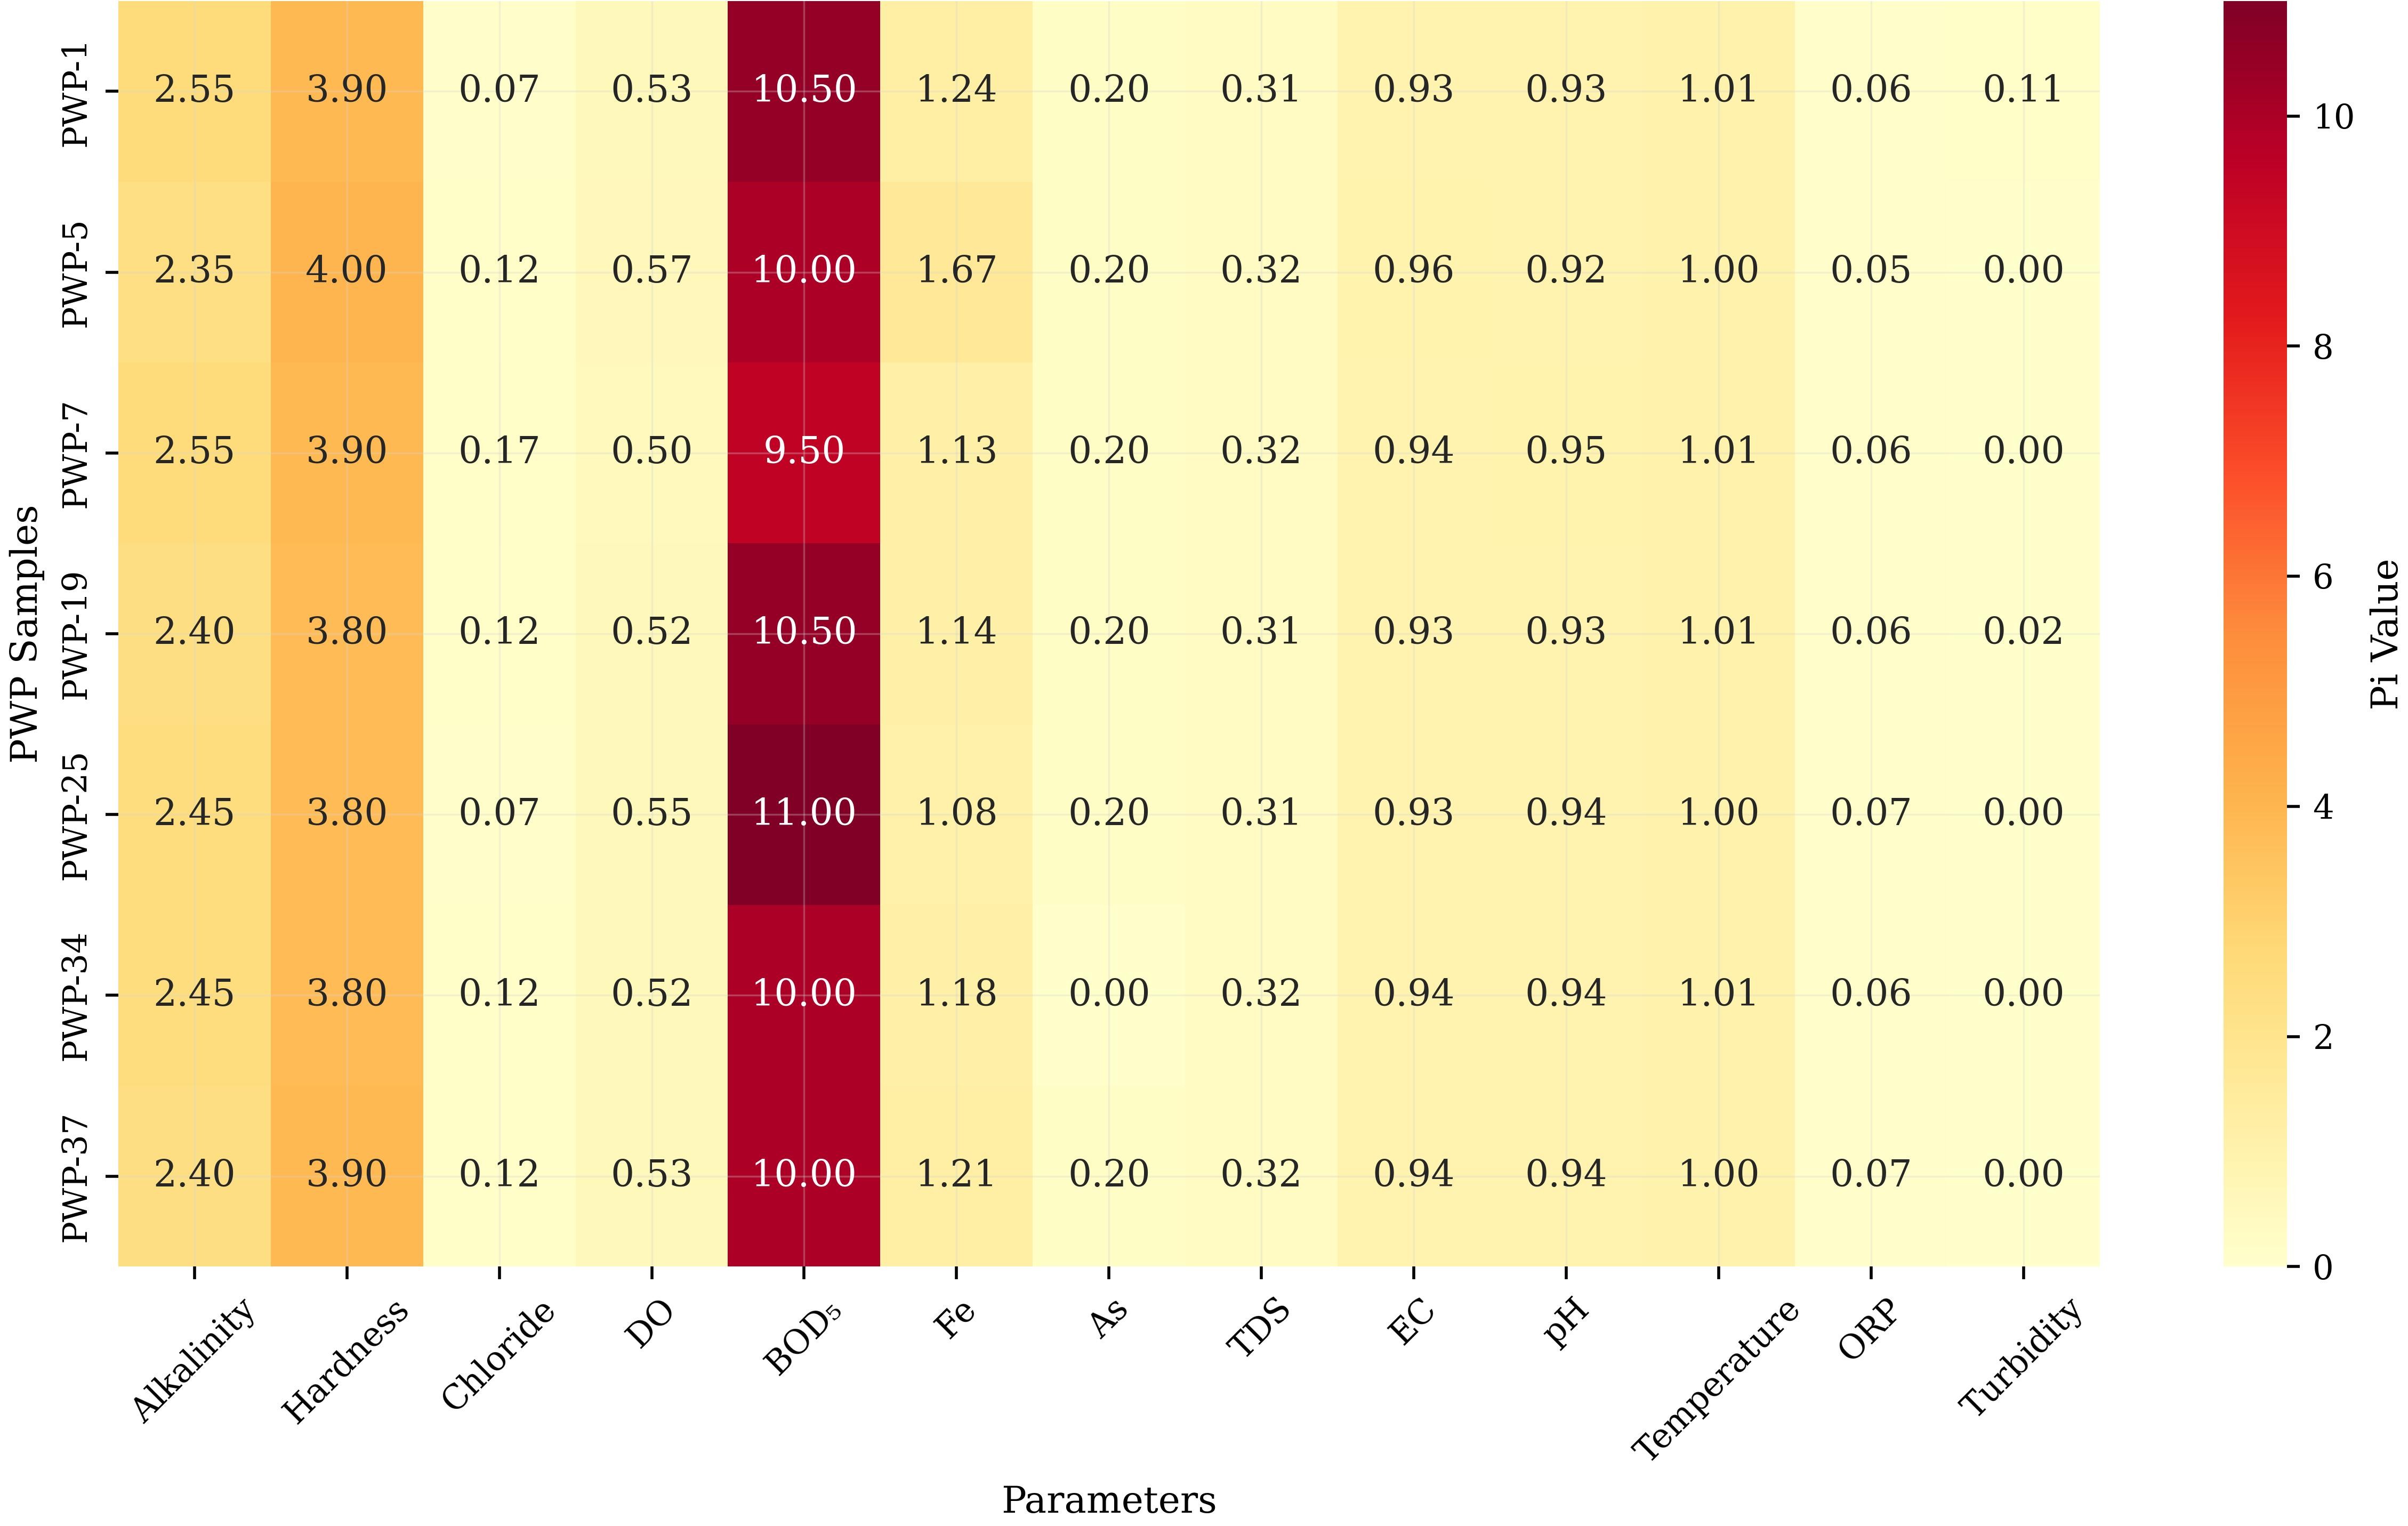


**Fig. S1.** Site-specific contributing pollutants at PWPs


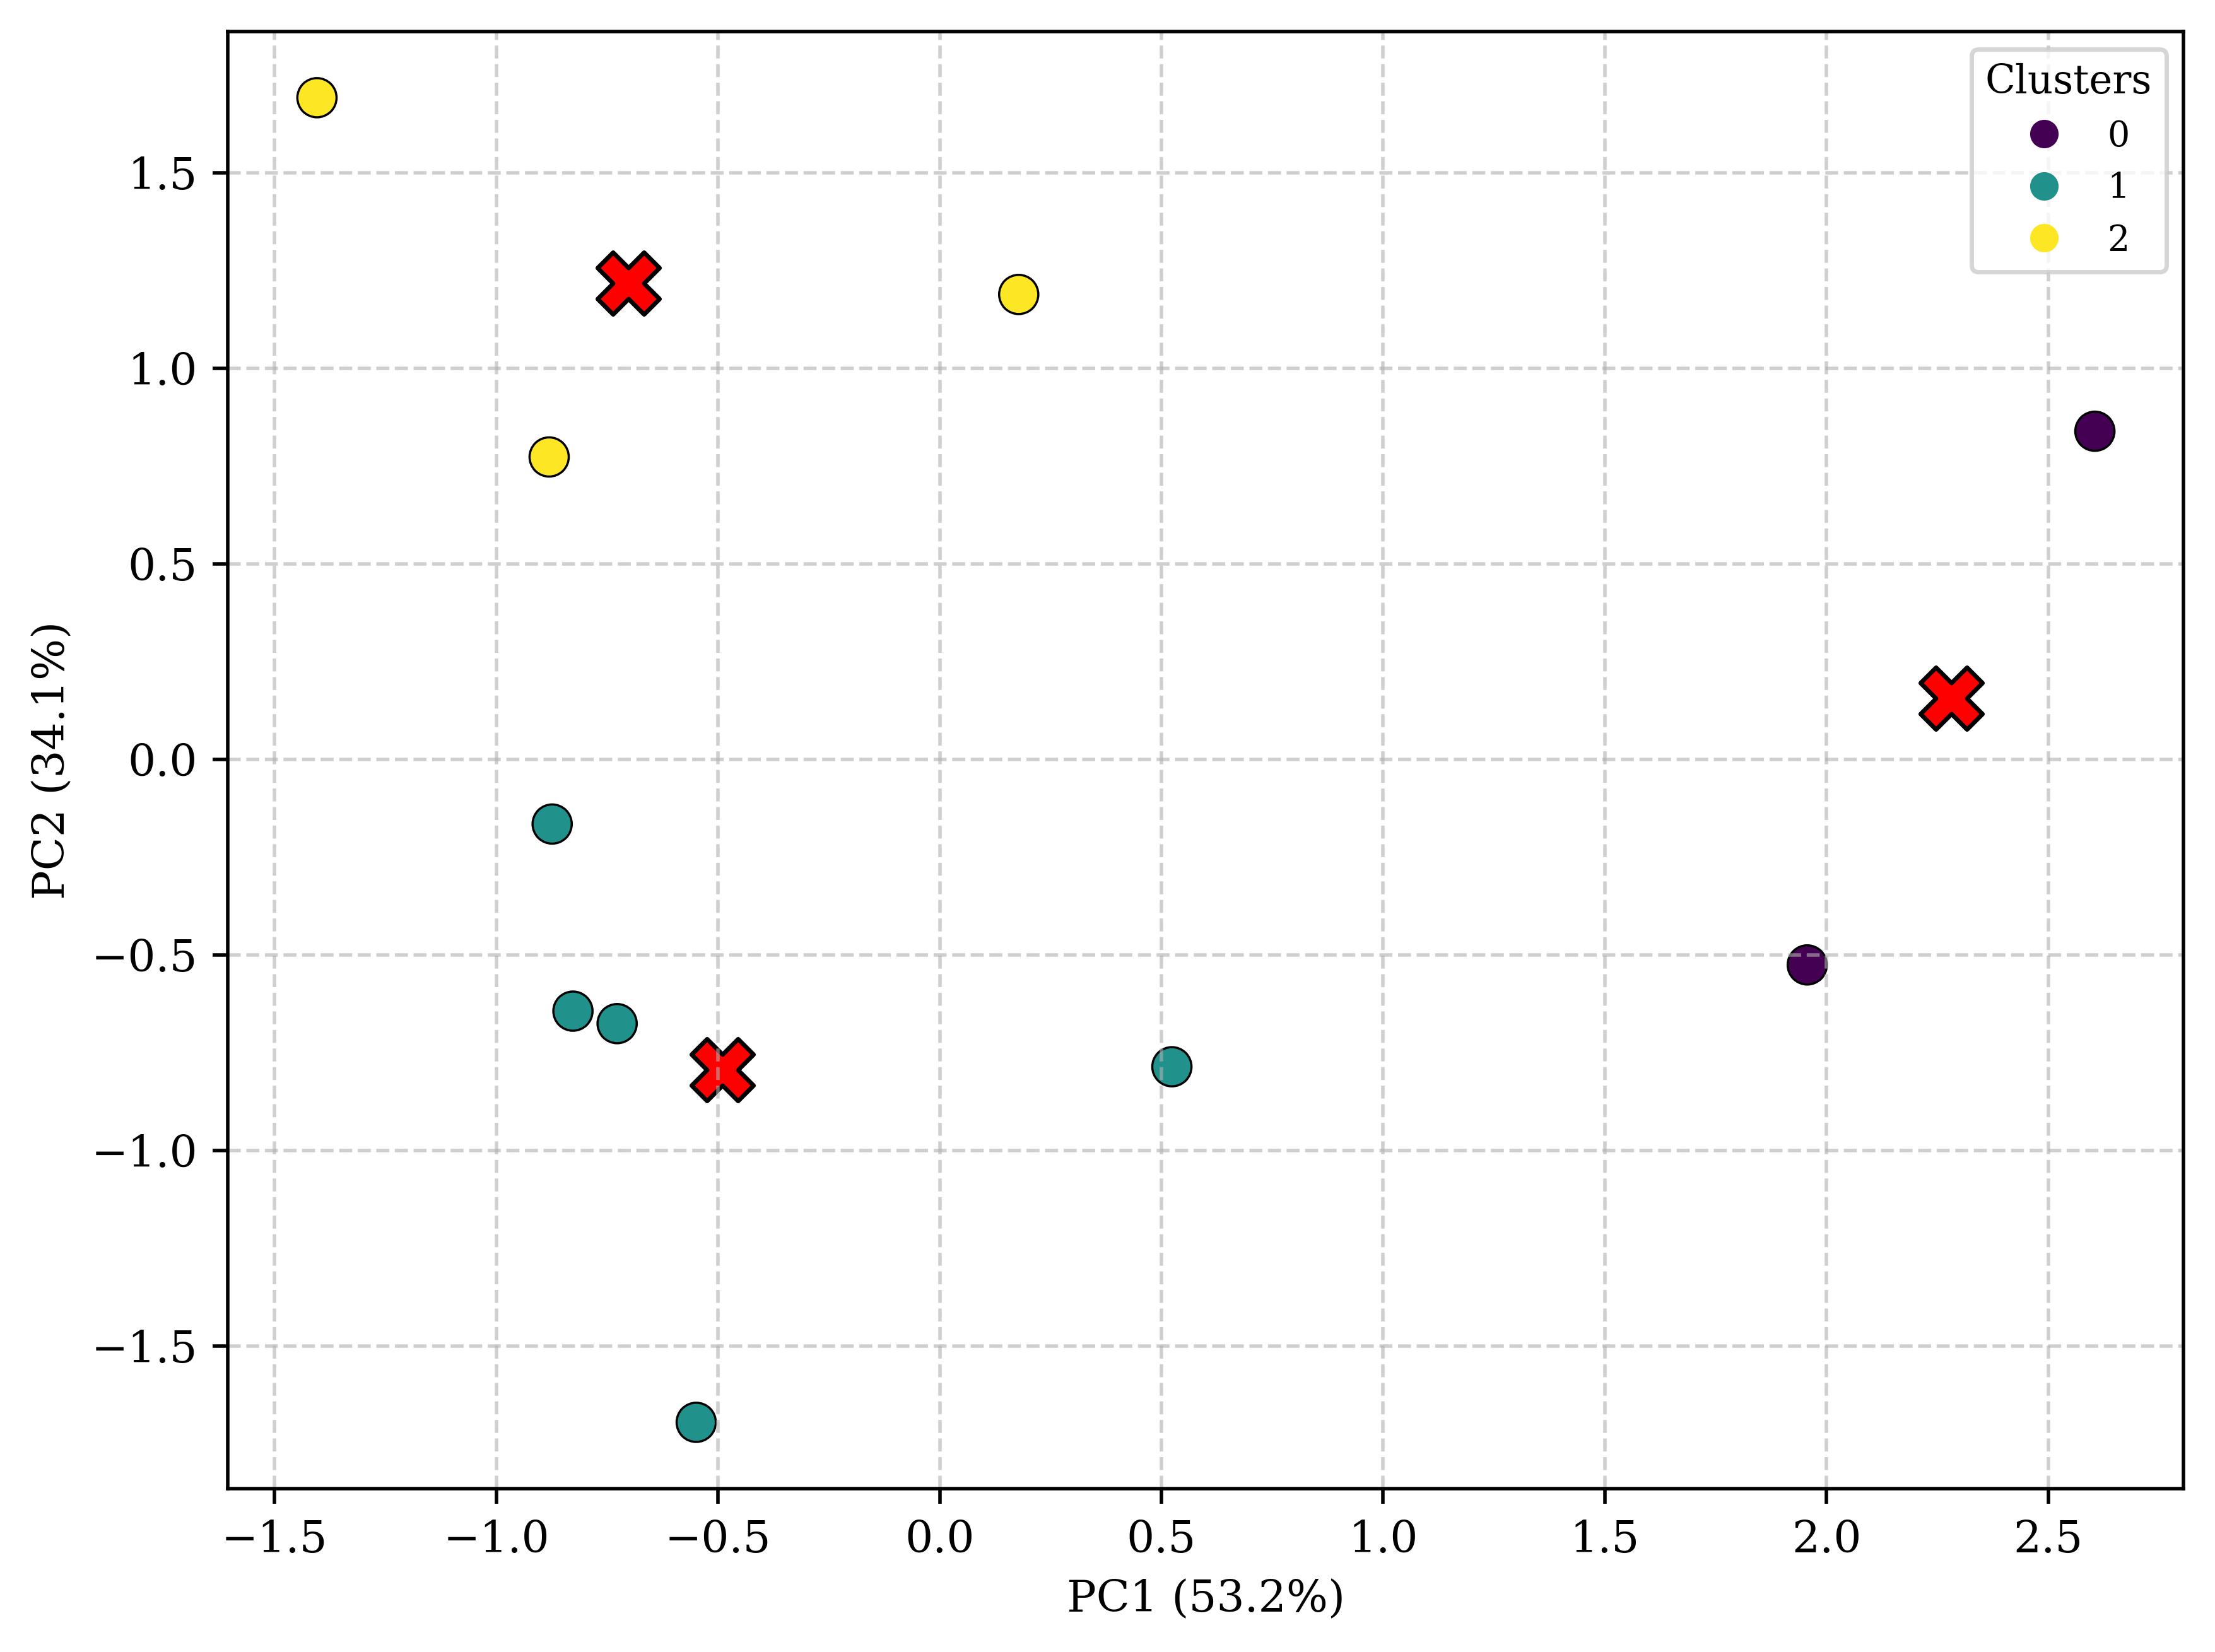


**Fig. S2.** PCA result showing the rank of the most influential factor for the combined KAP


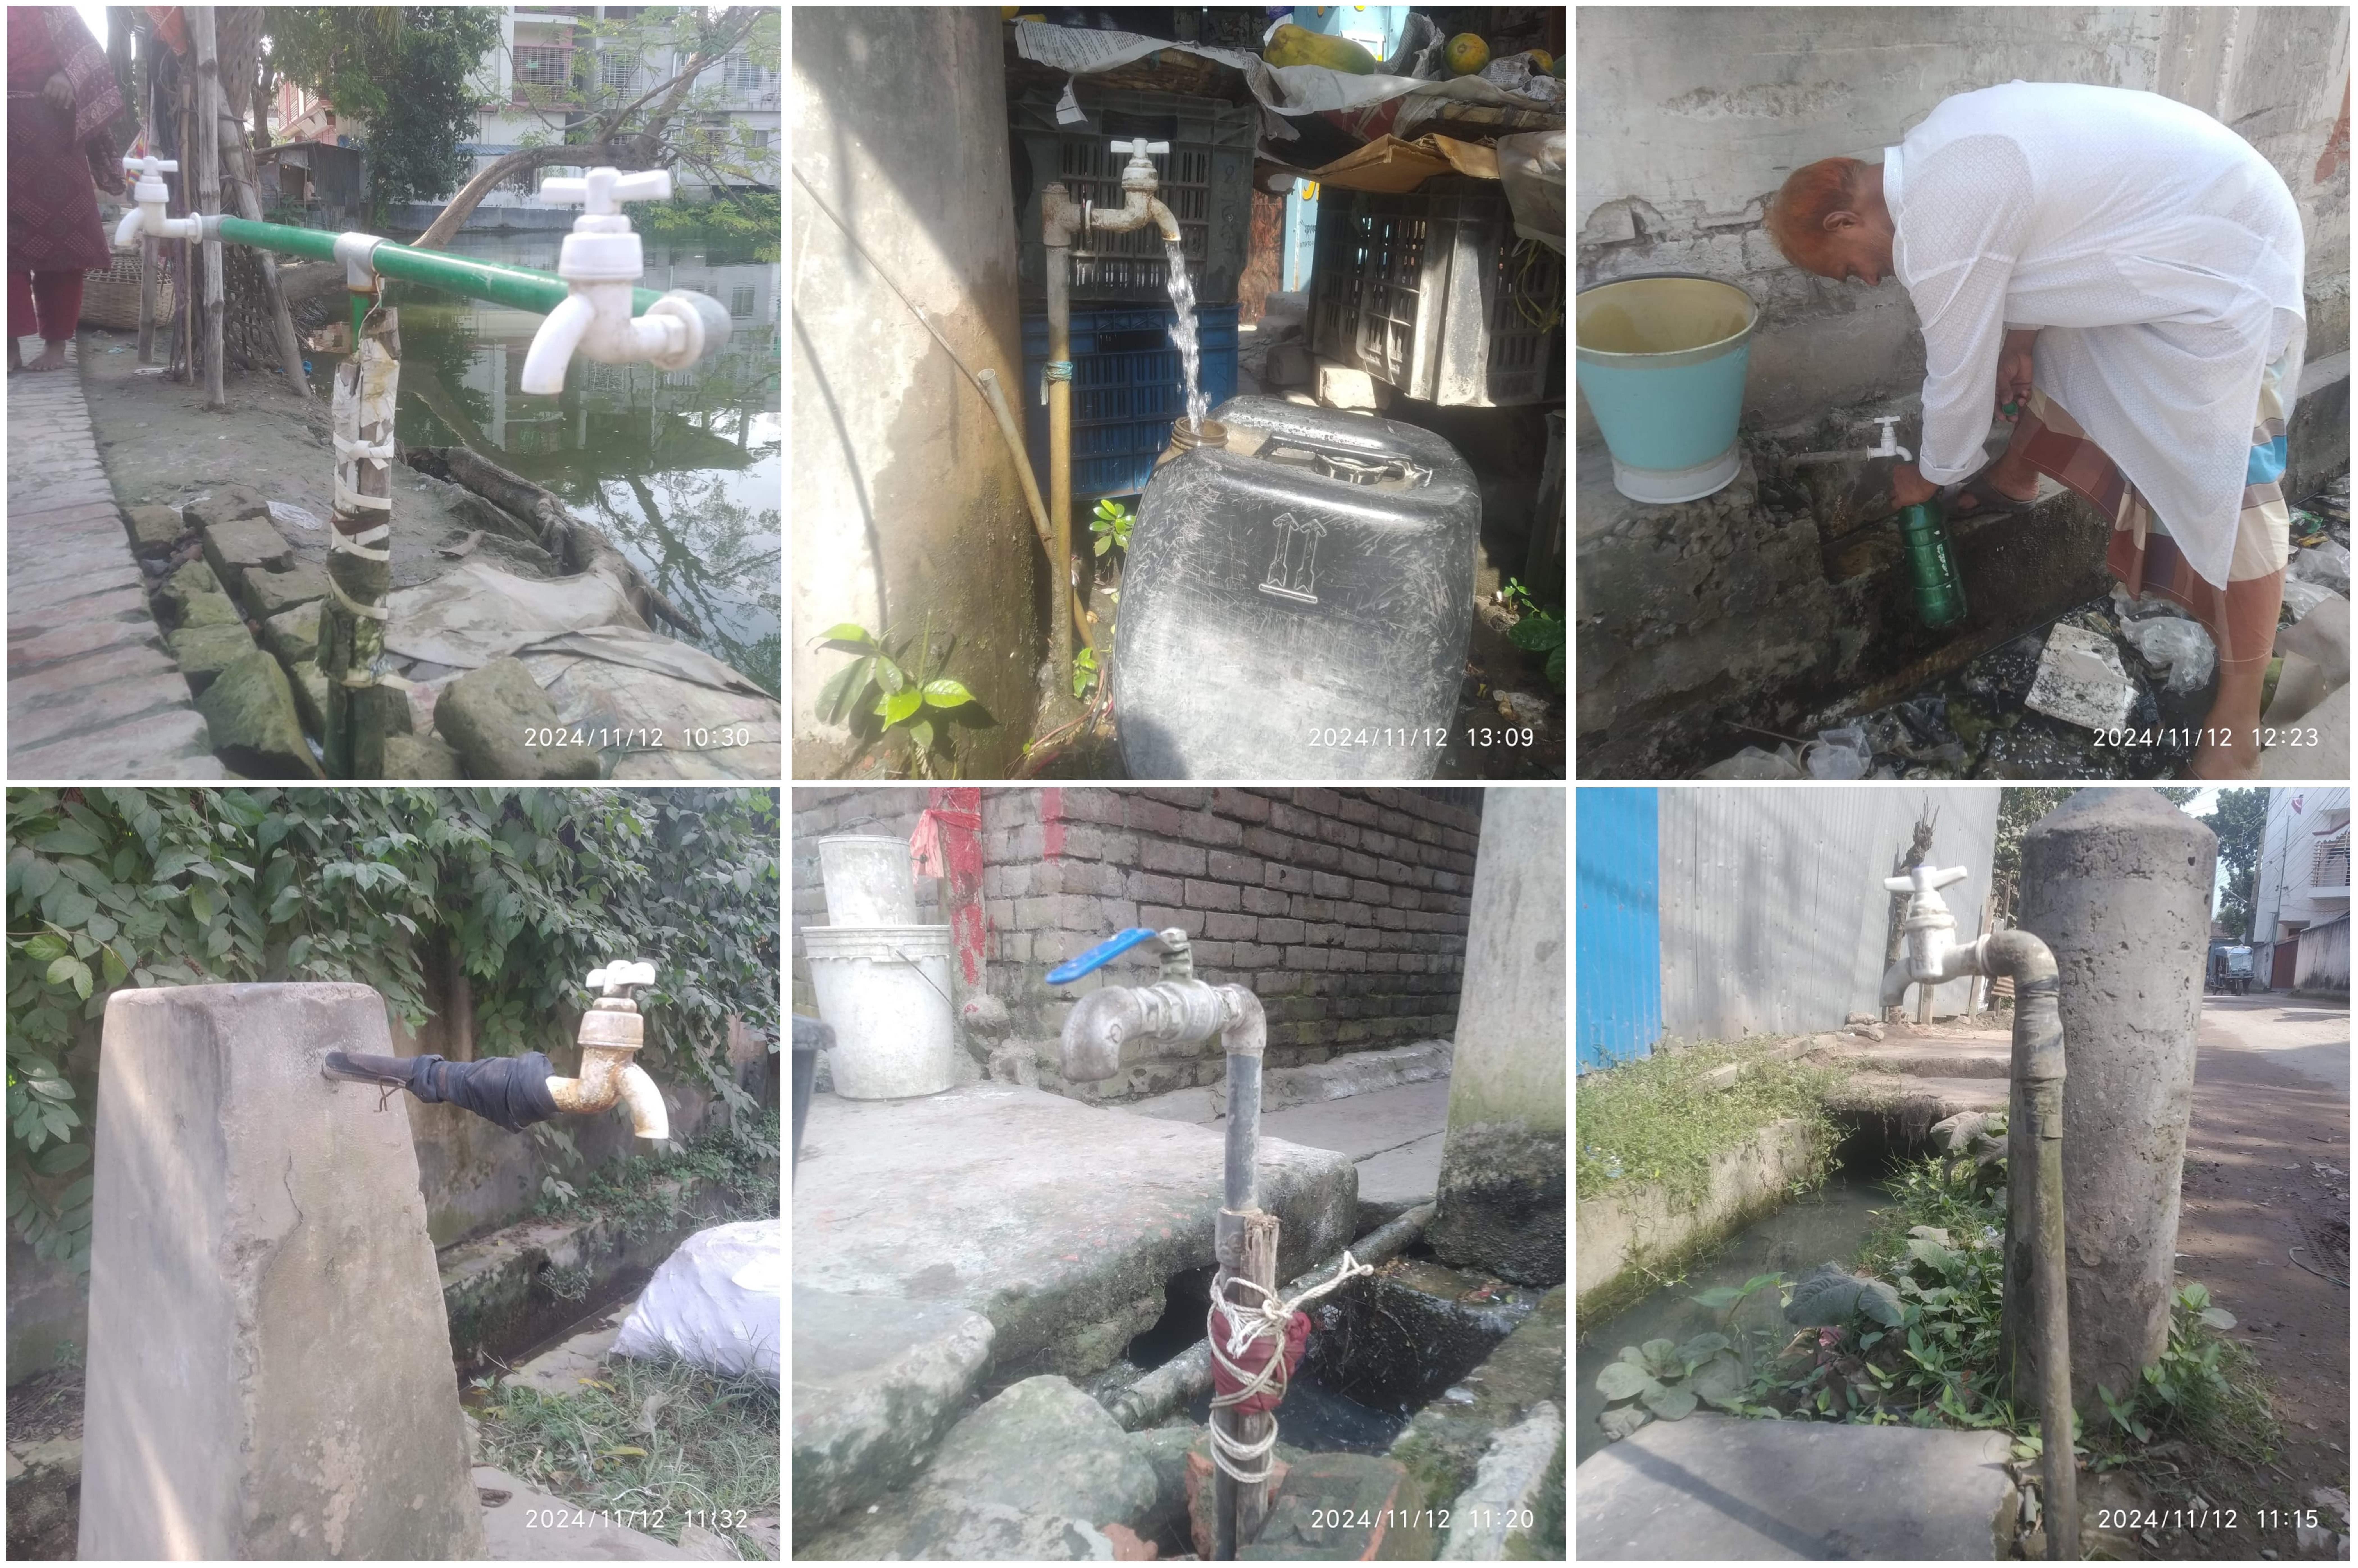


**Fig. S3.** PWP in Kushtia Municipality is mostly situated near drains (Source: Field Survey, 2024)

**Appendix B: Supplementary Tables**

**Table S1.** Public water points (PWP) in Kushtia Municipality, Bangladesh (translated from the original document)

| Serial no. | PWP no. | Ward no. | Location | | | Status |
| --- | --- | --- | --- | --- | --- | --- |
|  |  |  | Absolute location | | Relative Location |  |
|  |  |  | Latitude | Longitude |  |  |
| 1 | 23 | 19 | 23.89241389 | 89.11125556 | Jhenaidah Road | Operational |
| 2 | 19 | 5 | 23.8899 | 89.13191389 | Mujibur Rahman Road | Operational |
| 3 | 20 | 5 | 23.89408333 | 89.12395278 | Mujibur Rahman Road | Operational |
| 4 | 17 | 7 | 23.89799167 | 89.13157778 | Dr. Ainuddin Ahmed Road | Operational |
| 5 | 25 | 6 | 23.89172222 | 89.13156111 | Housing C Block | Operational |
| 6 | 18 | 6 | 23.88988333 | 89.13318056 | Housing C Expansion | Operational |
| 7 | 37 | 12 | 23.88847778 | 89.14708056 | Dhaka Road, Lahini Battola | Operational |
| 8 | 21 | 12 | 23.88836667 | 89.14647778 | Nur Uddin Ahmed Road | Operational |
| 9 | 22 | 11 | 23.89791667 | 89.14444722 | Mohini Mahan Chakraborty Road | Operational |
| 10 | 16 | 10 | 23.88456944 | 89.14238889 | Rajab Ali Khan Road | Operational |
| 11 | 14 | 10 | 23.90301111 | 89.14349444 | Kabi Azizur Rahman Road | Operational |
| 12 | 46 | 10 | 23.90213333 | 89.14551389 | Kabi Azizur Rahman Road | Operational |
| 13 | 47 | 10 | 23.90149444 | 89.14687222 | Kabi Azizur Rahman Road | Operational |
| 14 | 40 | 12 | 23.89911944 | 89.14616389 | Mohini Mahan Chakraborty Road | Operational |
| 15 | 45 | 10 | 23.89643889 | 89.14917222 | Mil Line Quarter | Non-operational |
| 16 | 36 | 10 | 23.89749444 | 89.15039167 | Lalon Shah Road | Operational |
| 17 | 52 | 10 | 23.90185 | 89.14795556 | Char Milpara, Balur Ghat | Operational |
| 18 | 39 | 10 | 23.90222222 | 89.14205833 | Bihari Colony | Operational |
| 19 | 53 | 10 | 23.90243611 | 89.14217778 | Bihari Colony | Operational |
| 20 | 43 | 9 | 23.90342222 | 89.1422 | Abdul Aziz Road | Operational |
| 21 | 29 | 10 | 23.90460833 | 89.14161389 | Boro Bazar Baroyari Tola Road | Operational |
| 22 | 27 | 8 | 23.90390556 | 89.14221944 | Sifatullah Biswas Road | Operational |
| 23 | 31 | 3 | 23.90686111 | 89.13744444 | Bonku Bihari Road | Operational |
| 24 | 54 | 1 | 23.90688611 | 89.13649167 | In front of Paurashava | Operational |
| 25 | 33 | 3 | 23.90622222 | 89.13568333 | NS Road | Operational |
| 26 | 32 | 3 | 23.90536389 | 89.13476667 | NS Road | Operational |
| 27 | 9 | 3 | 23.90641944 | 89.13521944 | NS Road | Operational |
| 28 | 4 | 1 | 23.91010278 | 89.12253056 | Chaudhari Kaushar Uddin Road | Operational |
| 29 | 11 | 3 | 23.91113333 | 89.12273333 | Bonku Bihari Road | Operational |
| 30 | 6 | 1 | 23.91191944 | 89.12248611 | Chad Mohammad Road | Operational |
| 31 | 55 | 1 | 23.91240833 | 89.12231667 | Dr. Aminul Islam's Chamber | Operational |
| 32 | 5 | 1 | 23.90989444 | 89.12366111 | NS Road | Operational |
| 33 | 10 | 3 | 23.90888889 | 89.12717778 | NS Road | Operational |
| 34 | 24 | 16 | 23.905225 | 89.106725 | A.K Mukherjee Road | Operational |
| 35 | 2 | 1 | 23.91180833 | 89.11431389 | Dadapur Road | Operational |
| 36 | 1 | 1 | 23.91054167 | 89.11617778 | Dadapur Road | Operational |
| 37 | 56 | 10 | 23.90745 | 89.12141389 | Hanif Counter, Mozompur | Operational |
| 38 | 13 | 10 | 23.90863611 | 89.12184167 | Mozompur Railgate | Operational |
| 39 | 7 | 2 | 23.901 | 89.125 | Hospital Mor | Operational |
| 40 | 3 | 1 | x | x | Chaudhari Kaushar Uddin Road | Non-operational |
| 41 | 8 | 3 | x | x | Lutfar Munshi Road | Non-operational |
| 42 | 12 | 10 | x | x | Dr. Qudrat-i-Khuda Road | Non-operational |
| 43 | 15 | 9 | x | x | Bardakhanta Shah Road | Non-operational |
| 44 | 26 | 9 | x | x | Bardakhanta Shah Road | Non-operational |
| 45 | 28 | 8 | x | x | Ananda Mohan Bagci Road | Non-operational |
| 46 | 30 | 10 | x | x | Shirish Chandra Banerjee Road | Non-operational |
| 47 | 34 | 3 | x | x | Lutfar Munshi Road | Non-operational |
| 48 | 35 | 10 | x | x | Dr. Qudrat-i-Khuda Road | Non-operational |
| 49 | 38 | 12 | x | x | Lokai Mistri Road | Non-operational |
| 50 | 41 | 10 | x | x | Mahashoshan Road | Non-operational |
| 51 | 42 | 10 | x | x | Dr. Qudrat-i-Khuda Road | Non-operational |
| 52 | 44 | 10 | x | x | Rabindra Sarani Road | Non-operational |
| 53 | 48 | 9 | x | x | Debi Pharashad Chakravarti Road | Non-operational |
| 54 | 49 | 9 | x | x | Rajab Ali Khan Road | Non-operational |
| 55 | 50 | 9 | x | x | Chandramouli Syannal Street | Non-operational |
| 56 | 51 | 9 | x | x | Chandra Charan Road | Non-operational |


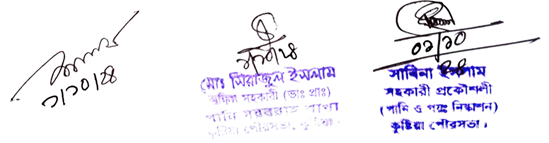


**Table S2.** Analytical parameters and methods for laboratory testing

| **Parameters** | **Analyzer** | **Model and brand** | **Analytical method** | **Standard values** | **References** |
| --- | --- | --- | --- | --- | --- |
| Alkalinity | Test kit (LR and HR) | LH2018 and LH2019 (Lohand) | Acid-base titration method | 20–200 | Hossain et al., 2025 |
| Hardness | Test kit | LH2013 (Lohand) | EDTA titration method | 80–100 |
| Chloride | Test kit | LH2015 (Lohand) | Silver nitrate titration method | 150–600 |
| DO | DO meter (Acc. ±0.4) | DO-5509 (Lutron) | Electrochemical reaction | 6 |
| BOD5 | BOD meter | BOD-PC02 (BIOBASE) | Respirometric (Incubation) | 0.2 |
| Iron | Iron checker (Acc. ±0.04) | HI-721 (Hanna) | Colorimetric | 0.3–1.0 |
| Arsenic | Test kit (LR) | Test Strip (Hach) | Colorimetric | 0.05 |
| TDS | Multimeter (Acc. ±1%) | CON30 (CLEAN) | Electrochemical reaction | 1,000 |
| EC | Multimeter (Acc. ±1%) | CON30 (CLEAN) | Electrochemical reaction | 700 |
| pH | Multimeter (Acc. ±0.01) | PH-220 (BIOBASE) | Electrochemical reaction | 6.5–8.5 |
| Temperature | Multimeter (Acc. ±0.5°C) | PH-220 (BIOBASE) | Electrochemical reaction | 20–30 |
| ORP | Multimeter (Acc. ±1 mV) | PH-220 (BIOBASE) | Electrochemical reaction | Around 250 mV |
| Turbidity | Turbidity meter | TU-2016  Lutron | Nephelometric method | 10 |

**Table S3.** Parameters and input assumptions, and values for calculating CDI via dermal absorption and ingestion for adults and children

| Parameter | Ingestion | | Dermal | | Reference |
| --- | --- | --- | --- | --- | --- |
|  | Adult | Children | Adult | Children |  |
| Measured metal concentrations (Cw, µg/L) | - | - | - | - | - |
| Ingestion rate (IR, L/day) | 3.5 | 1.32 | - | - | Hossain et al., 2025 |
| Dermal permeability coefficient (Kp, cm/h) | Fe: 1×10−3, As: 4×10−4 | | - | - |
| Exposure time (ET, h/event) | 0.58 | 1 | - | - |
| Skin-surface area (SA, cm2) | 18000 | 6600 | - | - |
| Exposure duration (ED, year) | 30 | 6 | 30 | 6 |
| Exposure frequency (EF, day/years) | 365 | | | |
| Conversion factor (CF, L/cm3) | 0.001 | | - | - |
| Body weight (BW, kg) | 57.5 | 15 | 57.5 | 15 |
| Average time (AT, day) | 10950 | 2190 | 10950 | 2190 |

**Table S4.** CDI values of Iron and Arsenic through ingestion and dermal exposure from different PWP samples

| PWP | Ingestion (µg/kg/day) | | Dermal (µg/kg/day) | |
| --- | --- | --- | --- | --- |
| Iron | Arsenic | Iron | Arsenic |
| PWP-1 | 33.97260 | 0.17734 | 0.27397 | 0.00143 |
| PWP-5 | 45.75342 | 0.23883 | 0.27397 | 0.00143 |
| PWP-7 | 30.95890 | 0.16161 | 0.27397 | 0.00143 |
| PWP-19 | 31.23288 | 0.16304 | 0.27397 | 0.00143 |
| PWP-25 | 29.58904 | 0.15445 | 0.27397 | 0.00143 |
| PWP-34 | 32.32877 | 0.16876 | 0.00000 | 0.00000 |
| PWP-37 | 33.15068 | 0.17305 | 0.27397 | 0.00143 |

**Table S5.** HQ values for Iron and Arsenic through ingestion and dermal exposure from different PWP samples

| PWP | Ingestion | | Dermal | |
| --- | --- | --- | --- | --- |
| Iron | Arsenic | Iron | Arsenic |
| PWP-1 | 0.04853 | 0.00025 | 0.91324 | 0.00477 |
| PWP-5 | 0.06536 | 0.00034 | 0.91324 | 0.00477 |
| PWP-7 | 0.04423 | 0.00023 | 0.91324 | 0.00477 |
| PWP-19 | 0.04462 | 0.00023 | 0.91324 | 0.00477 |
| PWP-25 | 0.04227 | 0.00022 | 0.91324 | 0.00477 |
| PWP-34 | 0.04618 | 0.00024 | 0.00000 | 0.00000 |
| PWP-37 | 0.04736 | 0.00025 | 0.91324 | 0.00477 |

**Appendix C: Questionnaire**

| **Department of Geography and Environment Islamic University**  **Kushtia-7003, Bangladesh** | 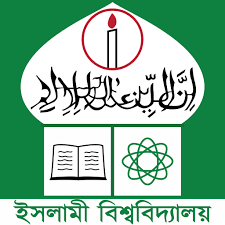 | **wRIMÖvdx GÛ এনভায়রনমেন্ট wefvM**  **Bmjvgx wek^we`¨vjq**  **Kzwóqv-7003, evsjv‡`k** |
| --- | --- | --- |

**Knowledge, Attitude, and Practice (KAP) Survey on Water, Sanitation, and Hygiene (WASH) in Free Tap Water Sources in Kushtia Municipality, Bangladesh**

This survey is being conducted under the supervision and guidance of the Department of Geography and Environment, Islamic University, Kushtia-7003, Bangladesh. The collected data will only be used for academic and research purposes. The necessary ethical guidelines for human participation during the study will be followed strictly. No individual name or personal details will be shared with any entity without the respondents' proper consent.

**Funding Organization:** University Grant Commission (UGC)

**Authorized by:** Islamic University, Kushtia.

**Ref. no.:** 141/Edu/IU-2024/31

**Fiscal Year:** 2024-25

**Name of the Principal Investigator/Supervisor:** Md. Inzamul Haque, Assistant Professor, Dept. of Geography & Environment.

[**www.iu.ac.bd**](http://www.iu.ac.bd) **|** [**chairman@ge.iu.ac.bd**](mailto:chairman@ge.iu.ac.bd) **| Phone: +88-07162201-6/62005-6/62008 Ext: 2509 | Fax: +88-02477786705**

**(signed)**

**(signed)**

**(signed)**

Seal and signature of

the Principal Investigator

Seal and signature of

the Principal Investigator

Seal and signature of

the Local Authority

Date:

**Section A: Demographics**

1. **PWP No.:**
2. **Location:**
3. **Name:**
4. **Age:**
5. **Gender-**

- Male
- Female
- Prefer not to say

1. **Education Level-**

- No formal education (Illiterate or can only sign their name)
- Primary education (Class 1–5)
- Secondary education (Class 6–10, SSC or equivalent)
- Higher secondary education (HSC or equivalent)
- Undergraduate and above (Bachelor’s, Master’s, or higher degrees)

1. **Occupation-**

- Unemployed (students, homemakers)
- Day laborer
- Govt./private employee
- Self-employed/professional
- Retired
- Businessman
- Other

1. **Average Monthly Income: _________________**
2. **Duration of residence in Kushtia Municipality: ______________________**
3. **Secondary sources of water supply**

- Tube well
- Surface water
- Bottle water
- Other (mention)__________________________________________________

1. **How long have you been using pipeline water?________________________**
2. **How many people in your family/institution directly depend on PWP water?___________________**
3. **Do you have children and other vulnerable groups in your family who depend on PWP water?**

- Yes
- No

1. **What is the number of children and other vulnerable groups in your family/institution who depend on PWP water?____________________________**
2. **What is the purpose of using PWP water?**

- Drinking Water
- Bathing
- Household Use (cooking, cleaning)
- Commercial Use (businesses, hotels, etc.)
- Other

1. **In which of the following purposes can PWP water be used?**

- Drinking
- Bathing
- Household Use (cooking, cleaning)
- Commercial Use (businesses, hotels, etc.)
- All possible uses

*Understanding or awareness about PWP water uses*

**Section B: Knowledge**

1. **Do you know how the water is treated before it reaches you?**

- Yes
- No
- Maybe

1. **Do you think microbial contaminants (e.g., bacteria, viruses) might be present in PWP water?**

- Yes
- No
- Maybe

1. **Do you think chemical contaminants (e.g., arsenic, lead, iron) might be present in PWP water?**

- Yes
- No
- Maybe

1. **Do you think physical contaminants (e.g., sediment, rust) might be present in PWP water?**

- Yes
- No
- Maybe

1. **As per your knowledge, how is the quality of your accessed water?**

**
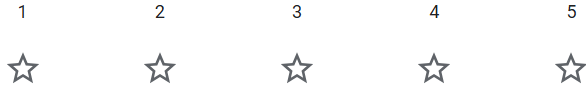
**

1. **Does the current supplied water fit for drinking?**

- Yes
- No
- Maybe

1. **Are you aware of any water quality standards set by the government?**

- Yes
- No
- Maybe

1. **Are you aware of any health risks associated with PWP water?**

- Yes
- No
- Maybe

1. **Are you aware of the potential health risks for children and vulnerable people groups from exposure to high levels of iron and arsenic?**

- Yes
- No
- Maybe

1. **Do you believe that your knowledge about water safety influences your practices?**

- Yes
- No
- Maybe

1. **Do you know, who is responsible for maintenance, monitoring, and improving water quality in your area?**

- Yes (mention)
- No
- Maybe
- ____________________________________________________________________

1. **Have you taken any steps to improve your knowledge about pipeline water safety?**

- Yes
- No
- Maybe

**Section C: Attitude**

*The feelings or mindset towards PWP water uses*

1. **How satisfied are you with the quality of pipeline water?**

**
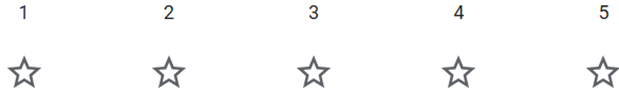
**

1. **Do you believe pipeline water is safe to drink without further treatment?**

- Yes
- No
- Maybe

1. **How important is it to you that the water you drink is free from contaminants?**

- Very important
- Important
- Neutral
- Not important

1. **Do you trust the local authorities to provide safe drinking water?**

- Yes
- No
- Maybe

1. **How willing are you to pay for improvements in the water supply system?**

**
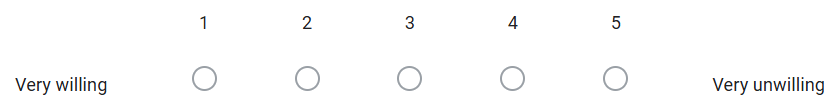
**

1. **Do you believe that the current water quality poses a health risk to you and your family?**

- Yes
- No
- Maybe

1. **How concerned are you about the quality of your drinking water?**

**
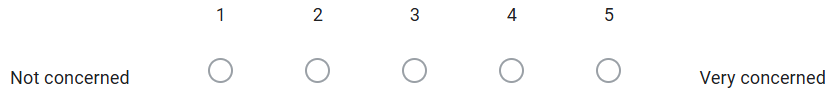
**

1. **How confident are you in protecting yourself from waterborne diseases?**

**
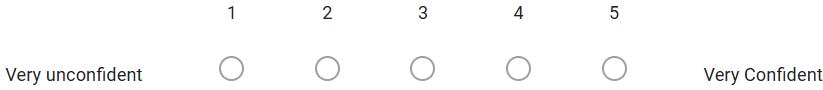
**

1. **How often do you discuss water safety with family or neighbors?**

- Frequently
- Occasionally
- Rarely
- Never

1. **Do you think community awareness programs are effective in improving water safety practices?**

- Yes
- No
- Maybe

*The actual behavior or actions taken based on knowledge and attitude*

**Section D: Practice**

1. **Do you use any additional filtration or treatment methods for pipeline water?**

- Yes
- No

1. **Do you have an additional storage tank?**

- Yes
- No

1. **How often do you clean the bottles or containers used for storing water from the pipeline?**

- Regularly (At least once a week) (1)
- Frequently (Every 1–2 weeks) (0.75)
- Occasionally (Once a month) (0.5)
- Rarely (Less than once a month) (0.25)

Never (0)

1. **How do you ensure the cleanliness of the containers you use for storing water?**

- Regularly clean with soap and water
- Occasionally rinse with water
- Clean only when visibly dirty
- Rarely clean the containers
- Never clean the containers

1. **Do you regularly check the color, taste, and smell of the water before using it?**

- Yes
- No

1. **How do you react when your drinking water appears cloudy or has an unusual smell?**

- Drink it anyway (0)
- Try to treat it (e.g., filter, boil) before drinking (0.5)
- Discard it and find another safe source (1)

1. **How often do you drink water directly from the pipeline without boiling or filtering it?**

- Always
- Often
- Sometimes
- Rarely
- Never

1. **Have you ever reported a water quality issue to the local authorities?**

- Yes
- No

1. **Do you actively educate others about water safety and hygiene practices?**

- Yes
- No
- Maybe

1. **How often do you take action based on your concerns about water quality?**

- Always
- Often
- Sometimes
- Rarely
- Never

1. **Have you ever participated in a community initiative or program designed to improve local water quality?**

- Yes
- No

**Section E: Challenges and Suggestions**

1. **What challenges do you face in accessing safe drinking water from the pipeline?**

- Irregular supply
- Low water pressure
- Poor water quality
- Lack of maintenance
- Odor

1. **Does prolonged use of PWP water through skin contact (e.g., bathing or washing) affect your health?**

- Yes
- No
- Maybe

1. **If yes, what are the visible dermal effects?**

- Rashes: Red, inflamed patches of skin
- Itching
- Blisters
- Dry or Flaky Skin
- Other (mention)_________________________________________________

1. **Have you faced any health issues from drinking or ingesting pipeline water?**

- Yes
- No
- Maybe

1. **Observed health issues**

- Gastrointestinal Issues: Diarrhea, vomiting, and stomach cramps
- Infectious Diseases: Cholera, dysentery, and typhoid fever
- Toxicity from Chemicals: Neurological problems, kidney damage
- Reproductive and Developmental Issues: Fertility, pregnancy outcomes, and child development
- Chronic Health Conditions: Cancer, liver damage, and immune system suppression

1. **Have you noticed any damage to household accessories (e.g., faucets, pipes, or dishes) from using pipeline water?**

- Yes
- No
- Maybe

1. **How do you think the water supply system could be improved in Kushtia Municipality?**

- Regular maintenance
- Ensuring water quality
- Increasing supply hours
- Improving water pressure
- Expanding coverage
- Other

1. **What additional measures do you think should be taken to ensure the safety of pipeline water?**

- Regular water quality testing
- Upgrading treatment facilities
- Community awareness programs
- Prompt repair of leaks
- Introducing advanced filtration systems
- Don't know

1. **What role do you think the local government should play in improving water safety?**

**_______________________________________________________________________________________________________________________________________________________________________________________________________________**

1. **How can local authorities improve communication with residents regarding water safety issues?**

**______________________________________________________________________________________________________________________________________________________________________________________________________________________________**

1. **Would you be willing to participate in a community project focused on water safety?**

**______________________________________________________________________________________________________________________________________________________________________________________________________________________________**

**Signature of the surveyor Signature of the respondent**

**Checked by-**
